# Supplementary material for: Association between pre-diabetes and microvascular and macrovascular disease in newly diagnosed type 2 diabetes
Source: PubMed Central journal article supplement — BMJ Open Diabetes Res Care. 2020 Apr 23;8(1):e001061. doi: 10.1136/bmjdrc-2019-001061 (PMC7202749; doi:10.1136/bmjdrc-2019-001061), 2020-04-23

## Supplementary Material

### Association between pre-diabetes and microvascular and macrovascular disease in newly diagnosed type 2 diabetes

Raffaele Palladino MD<sup>1,2</sup>, Adam G. Tabák PhD<sup>3,4</sup>, Kamlesh Khunti PhD<sup>5</sup>, Jonathan Valabhji<sup>6</sup>, Azeem Majeed MD<sup>8</sup>, Christopher Millett PhD<sup>1,8</sup>, Eszter Vamos PhD<sup>1,8</sup>

1. Public Health Policy Evaluation Unit, School of Public Health, Imperial College London, London, United Kingdom
2. Department of Public Health, Faculty of Medicine, University “Federico II” of Naples, Italy
3. Department of Epidemiology and Public Health, University College London, London, United Kingdom
4. Semmelweis University Faculty of Medicine, 1st Department of Medicine, Budapest, Hungary
5. Diabetes Research Centre, Leicester Diabetes Centre, University of Leicester, Leicester, United Kingdom
6. Imperial College Healthcare NHS Trust, London, United Kingdom
7. NHS England, Skipton House, London, United Kingdom.
8. Department of Primary Care and Public Health, Imperial College London, London, United Kingdom

**Supplementary Figure S1.** Study diagram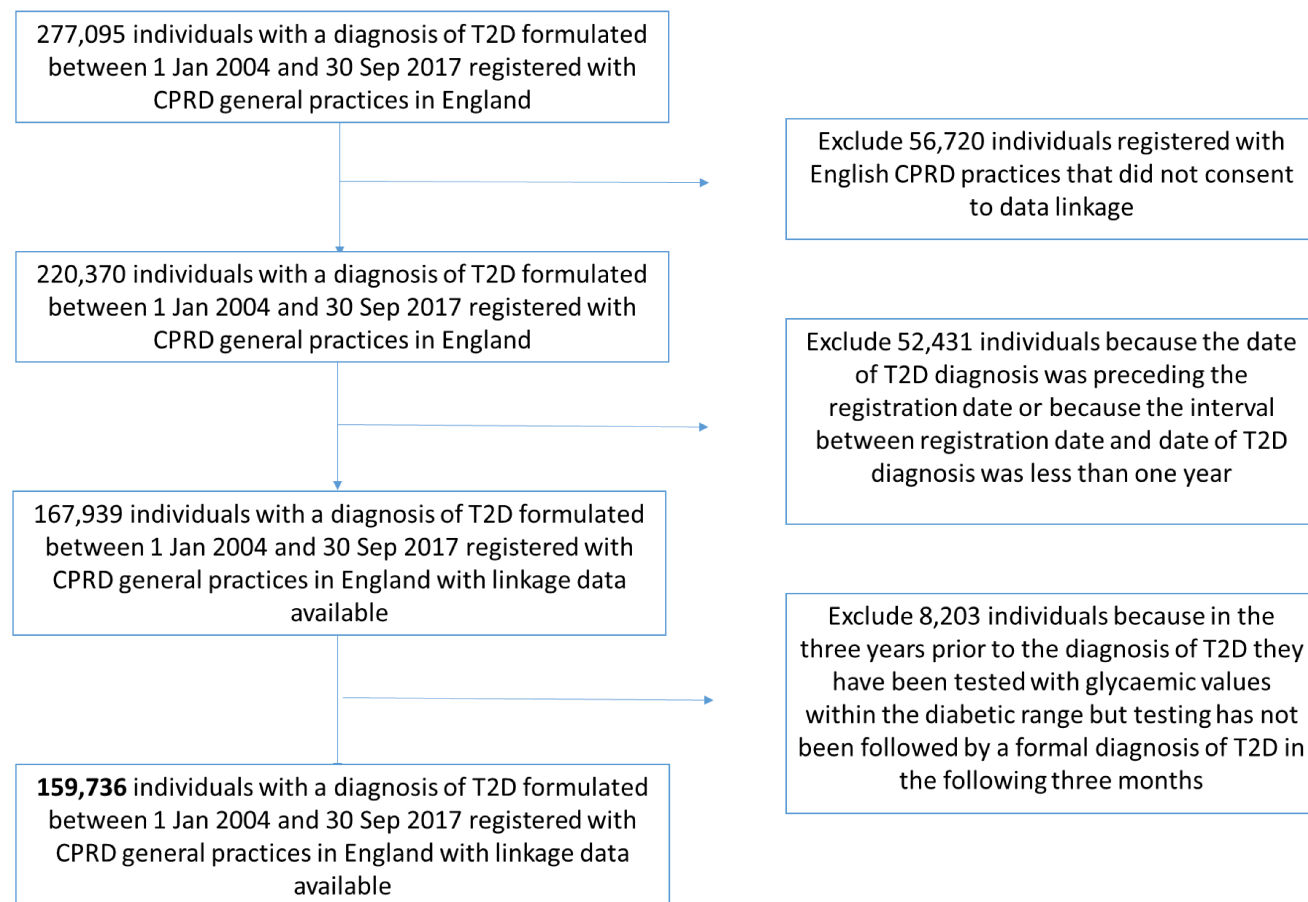

**Abbreviations:** T2D: Type 2 diabetes.

**Supplementary Table S2.** Definition of pre-diabetes and study outcomes

|                                                                                                                                                                                           |                                                                                                                                                                                                                                                                                                                                                                                                                                                                                                                                                                                                                         |
|-------------------------------------------------------------------------------------------------------------------------------------------------------------------------------------------|-------------------------------------------------------------------------------------------------------------------------------------------------------------------------------------------------------------------------------------------------------------------------------------------------------------------------------------------------------------------------------------------------------------------------------------------------------------------------------------------------------------------------------------------------------------------------------------------------------------------------|
| <b>Detection of Pre-diabetes</b>                                                                                                                                                          | <p>Laboratory diagnostic criteria:</p> <ul style="list-style-type: none"> <li>- World Health Organization/International Expert Committee: FPG 6.1-6.9 mmol/L; OGTT 7.8-11.1 mmol/L; HbA1c 42 to 47 mmol/mol (6.0-6.4%)</li> <li>- NICE: FPG 5.5-6.9 mmol/L; OGTT 7.8-11.1 mmol/L; HbA1c 42 to 47 mmol/mol (6.0-6.4%)</li> <li>- American Diabetes Association: FPG 5.6-6.9 mmol/L; OGTT 7.8-11.1 mmol/L; HbA1c 39 to 47 mmol/mol or 5.7-6.4%</li> </ul> <p>Diagnostic codes for pre-diabetes, Impaired Glucose Tolerance, Impaired Glucose Metabolism, Intermediate Hyperglycaemia, and Non-diabetic Hyperglycaemia</p> |
| <p><b>Microvascular disease present at time of diagnosis of Type 2 diabetes</b></p> <p>(diagnosed in the five years before and fifteen months after the diagnosis of Type 2 diabetes)</p> |                                                                                                                                                                                                                                                                                                                                                                                                                                                                                                                                                                                                                         |
| <b>Diabetic retinopathy</b>                                                                                                                                                               | <ul style="list-style-type: none"> <li>- Diagnostic codes for diabetic retinopathy (including codes for photocoagulation/vitreotomy, diabetic cataract, and acquired blindness)</li> <li>- Results from Diabetic retinopathy screening</li> <li>- ICD-X (E11.3; H36.0; H28.0)</li> <li>- OPCS-4 (C81.1; C81.2; C81.8; C81.9; C79.1; C79.2; C74.2)</li> </ul>                                                                                                                                                                                                                                                            |
| <b>Nephropathy</b>                                                                                                                                                                        | <ul style="list-style-type: none"> <li>- Diagnostic codes for Chronic Kidney Disease stage 3A and above (including end-stage renal disease and renal replacement therapy)</li> <li>- If any of the following conditions is present: <ul style="list-style-type: none"> <li>Microalbuminuria (albumin:creatinine ratio 30-300 mg/g);</li> <li>Macroalbuminuria (albumin:creatinine ratio <math>\geq</math> 300 mg/g);</li> <li>Serum creatinine <math>\geq</math> 3.3 mg/dL; GFR less than 60 mL/min per 1.73 m<sup>2</sup></li> </ul> </li> <li>- ICD-10 (N18.3; N18.4; N18.5)</li> <li>- OPCS-4 (M01; X40)</li> </ul>  |
| <p><b>Macrovascular disease at time of diagnosis of Type 2 diabetes</b></p> <p>(diagnosed before or within the year following the diagnosis of Type 2 diabetes)</p>                       |                                                                                                                                                                                                                                                                                                                                                                                                                                                                                                                                                                                                                         |
| <p><b>Cerebrovascular disease</b></p> <p>Stroke, Carotid Endarterectomy (CEA), Carotid artery stenting (CAS)</p>                                                                          | <p><b>Stroke</b></p> <ul style="list-style-type: none"> <li>- Diagnostic codes for haemorrhagic and ischaemic strokes</li> <li>- ICD-10 (I60-I64)</li> </ul> <p><b>CEA &amp; CAS</b></p> <ul style="list-style-type: none"> <li>- OPCS-4.6: L29.4; L29.5 (CEA); L31.4 (CAS)</li> </ul>                                                                                                                                                                                                                                                                                                                                  |
| <p><b>Acute Coronary Syndrome</b></p> <p>Acute Myocardial</p>                                                                                                                             | <p><b>AMI</b></p> <ul style="list-style-type: none"> <li>- Diagnostic codes for acute myocardial infarction</li> <li>- ICD-10 (I21; I22)</li> </ul> <p><b>CAD</b></p>                                                                                                                                                                                                                                                                                                                                                                                                                                                   |

|                                                                                                                                   |                                                                                                                                                                                                                                                                                                                                                         |
|-----------------------------------------------------------------------------------------------------------------------------------|---------------------------------------------------------------------------------------------------------------------------------------------------------------------------------------------------------------------------------------------------------------------------------------------------------------------------------------------------------|
| <p>Infarction (AMI),<br/>Coronary Artery<br/>Disease (CAD),<br/>Coronary<br/>Revascularisation<br/>Procedures</p>                 | <ul style="list-style-type: none"> <li>- Diagnostic codes for CAD</li> <li>- ICD-10 (I20; I25)</li> </ul> <p><b>Coronary Revascularisation Procedures</b></p> <ul style="list-style-type: none"> <li>- OPCS-4.6: K49; K50; K75; K40-K46)</li> </ul>                                                                                                     |
| <p><b>Peripheral<br/>Arterial disease</b></p> <p>Peripheral<br/>arterial disease<br/>(PAD), non-<br/>traumatic<br/>amputation</p> | <p><b>PAD</b></p> <ul style="list-style-type: none"> <li>- Diagnostic codes for peripheral arterial disease</li> <li>- ICD-10 (E11.5; I70.2/7; I70.92)</li> </ul> <p><b>AMPUTATION</b></p> <ul style="list-style-type: none"> <li>-Diagnostic codes for non-traumatic amputation</li> <li>-OPCS-4.6: (X09.2-5,8-9; X10.1,4,8-9; X11.1,2,8,9)</li> </ul> |

**Supplementary Table S3. Characteristics of the study population in the year following the diagnosis of Type 2 diabetes stratified by whether individuals were tested and reached detection thresholds for pre-diabetes before the diagnosis of Type 2 diabetes. Results are presented using NICE and ADA criteria for the definition of pre-diabetes.**

**Notes:** Clinical data within three years before the diagnosis of Type 2 diabetes were used to define the detection of pre-diabetes. For both diagnostic criteria (NICE and ADA) p-values from Chi-square and ANOVA tests, as appropriate, are reported in the last columns for comparison between the two groups defined by testing and detection of pre-diabetes.

Abbreviations: FPG: fasting plasma glucose, OGTT: glucose tolerance test (2-hour after 75 g glucose load), ACEi: Angiotensin-converting-enzyme inhibitor, ARBs: Antiotensin II receptor blockers.

NICE criteria to define pre-diabetes: 5.5-6.9 mmol/L, OGTT 7.8-11.1 mmol/L, HbA1c 42 to 47 mmol/mol or 6.0-6.4%

ADA criteria to define pre-diabetes: FPG: 5.6-6.9 mmol/L, OGTT 7.8-11.1 mmol/L, HbA1c 39 to 47 mmol/mol or 5.7-6.4%  
¥Chi-square test was performed to assess the unadjusted difference between groups

§ANOVA test was performed to assess the unadjusted difference between groups

ΩKruskal-Wallis test was performed to assess the unadjusted difference between groups

\* Medication groups are not mutually exclusive and patients with multiple medications prescribed are counted multiple times.

|                                                                 | Total       | No glycaemic measures recorded before the diagnosis of Type 2 diabetes | NICE DIAGNOSTIC CRITERIA <sup>2</sup>                                |                                                   |                     | ADA DIAGNOSTIC CRITERIA <sup>3</sup>                                 |                                                   |                     |
|-----------------------------------------------------------------|-------------|------------------------------------------------------------------------|----------------------------------------------------------------------|---------------------------------------------------|---------------------|----------------------------------------------------------------------|---------------------------------------------------|---------------------|
|                                                                 |             |                                                                        | Glycaemic values within the normal range before the diagnosis of T2D | Pre-diabetes detected before the diagnosis of T2D | p-values            | Glycaemic values within the normal range before the diagnosis of T2D | Pre-diabetes detected before the diagnosis of T2D | p-values            |
| N                                                               | 159,736     | 93,949                                                                 | 14,431                                                               | 51,356                                            |                     | 14,317                                                               | 51,470                                            |                     |
| %                                                               |             | 58.8                                                                   | 9.0                                                                  | 32.2                                              |                     | 9.0                                                                  | 32.2                                              |                     |
| Type of glycaemic measures recorded before diagnosis of T2D (%) |             |                                                                        |                                                                      |                                                   |                     |                                                                      |                                                   |                     |
| FPG                                                             |             |                                                                        | 72.8                                                                 | 78.1                                              |                     | 84.3                                                                 | 74.9                                              |                     |
| HbA1C                                                           |             |                                                                        | 41.9                                                                 | 54.3                                              |                     | 30.5                                                                 | 57.5                                              |                     |
| OGTT                                                            |             |                                                                        | 2.0                                                                  | 20.6                                              |                     | 3.0                                                                  | 20.3                                              |                     |
| Multiple tests                                                  |             |                                                                        | 16.0                                                                 | 50.9                                              |                     | 16.9                                                                 | 50.5                                              |                     |
| Time from testing to diagnosis of T2D, months; mean (SD)        | 33.0 (6.1)  |                                                                        | 32.7 (6.6)                                                           | 33.1 (6.0)                                        |                     | 33.1 (6.0)                                                           | 33.0 (6.2)                                        |                     |
| Female (%)                                                      | 49.2        | 48.8                                                                   | 59.0                                                                 | 47.1                                              | <0.001 <sup>¥</sup> | 58.1                                                                 | 47.3                                              | <0.001 <sup>¥</sup> |
| Age, years (SD)                                                 | 61.5 (14.4) | 60.2 (14.8)                                                            | 60.4 (15.4)                                                          | 64.1 (12.7)                                       | <0.001 <sup>§</sup> | 60.1 (15.3)                                                          | 64.2 (12.8)                                       | <0.001 <sup>§</sup> |
| Ethnicity (%)                                                   |             |                                                                        |                                                                      |                                                   |                     |                                                                      |                                                   |                     |
| White                                                           | 83          | 82.7                                                                   | 84.7                                                                 | 83                                                | <0.001 <sup>¥</sup> | 84.9                                                                 | 83                                                | <0.001 <sup>¥</sup> |
| South Asian                                                     | 3.6         | 3.1                                                                    | 3.9                                                                  | 4.5                                               |                     | 4.1                                                                  | 4.4                                               |                     |
| Black                                                           | 2.4         | 2.2                                                                    | 3.3                                                                  | 2.7                                               | <0.001 <sup>¥</sup> | 3.2                                                                  | 2.7                                               | <0.001 <sup>¥</sup> |
| Other                                                           | 3.1         | 2.9                                                                    | 3.3                                                                  | 3.3                                               |                     | 3.2                                                                  | 3.3                                               |                     |
| Unknown                                                         | 7.9         | 9.2                                                                    | 4.8                                                                  | 6.5                                               |                     | 4.6                                                                  | 6.6                                               |                     |
| Smoking status (%)                                              |             |                                                                        |                                                                      |                                                   |                     |                                                                      |                                                   |                     |
| Non-smoker                                                      | 35.4        | 36.8                                                                   | 30.2                                                                 | 36.7                                              | <0.001 <sup>¥</sup> | 37                                                                   | 32.5                                              | <0.001 <sup>¥</sup> |
| Ex-smoker                                                       | 51.6        | 43.4                                                                   | 51.2                                                                 | 47                                                |                     | 44.9                                                                 | 51.2                                              |                     |
| Current smoker                                                  | 16.1        | 19.8                                                                   | 18.6                                                                 | 16.3                                              |                     | 18.2                                                                 | 16.3                                              |                     |

(continued)

|                                                                           | Total        | No glycaemic measures recorded before the diagnosis of Type 2 diabetes | NICE DIAGNOSTIC CRITERIA <sup>2</sup>                                |                                                   |                     | ADA DIAGNOSTIC CRITERIA <sup>3</sup>                                 |                                                   |                     |
|---------------------------------------------------------------------------|--------------|------------------------------------------------------------------------|----------------------------------------------------------------------|---------------------------------------------------|---------------------|----------------------------------------------------------------------|---------------------------------------------------|---------------------|
|                                                                           |              |                                                                        | Glycaemic values within the normal range before the diagnosis of T2D | Pre-diabetes detected before the diagnosis of T2D | p-values            | Glycaemic values within the normal range before the diagnosis of T2D | Pre-diabetes detected before the diagnosis of T2D | p-values            |
| HbA1c at diagnosis, mmol/mol; mean (SD)                                   | 55.2 (20.7)  | 59.4 (20.8)                                                            | 45.4 (17.5)                                                          | 50.8 (19.7)                                       | <0.001 <sup>§</sup> | 46.0 (19.3)                                                          | 50.1 (18.8)                                       | <0.001 <sup>§</sup> |
| BMI, kg/m <sup>2</sup> ; mean (SD)                                        | 30.30 (6.7)  | 30.0 (6.7)                                                             | 28.9 (6.8)                                                           | 31.3 (6.6)                                        | <0.001 <sup>§</sup> | 29.1 (6.9)                                                           | 31.2 (6.6)                                        | <0.001 <sup>§</sup> |
| SBP, mm Hg; mean (SD)                                                     | 136.4 (15.9) | 136.4 (16.6)                                                           | 132.9 (15.9)                                                         | 137.2 (14.4)                                      | <0.001 <sup>§</sup> | 133.0 (15.9)                                                         | 137.2 (14.4)                                      | <0.001 <sup>§</sup> |
| DBP, mm Hg; mean (SD)                                                     | 79.7 (9.4)   | 80.1 (9.6)                                                             | 78.3 (9.4)                                                           | 79.4 (8.8)                                        | <0.001 <sup>§</sup> | 78.5 (9.4)                                                           | 79.4 (8.8)                                        | <0.001 <sup>§</sup> |
| Total cholesterol, mmol/L; mean (SD)                                      | 5.1 (1.1)    | 5.2 (1.1)                                                              | 5.1 (1.1)                                                            | 4.9 (1.1)                                         | <0.001 <sup>§</sup> | 5.1 (1.1)                                                            | 4.9 (1.1)                                         | <0.001 <sup>§</sup> |
| Number of chronic diseases; mean (SD)                                     | 2.7 (2.0)    | 2.4 (1.9)                                                              | 3.2 (2.1)                                                            | 3.1 (2.0)                                         | <0.001 <sup>§</sup> | 3.2 (2.1)                                                            | 3.1 (2.0)                                         | <0.001 <sup>§</sup> |
| Medications (%)                                                           |              |                                                                        |                                                                      |                                                   |                     |                                                                      |                                                   |                     |
| Anti-hypertensive                                                         | 53.8         | 47.5                                                                   | 47.2                                                                 | 67.1                                              | <0.001 <sup>¥</sup> | 48.2                                                                 | 66.8                                              | <0.001 <sup>¥</sup> |
| ACEi/ARBs                                                                 | 39           | 34.1                                                                   | 32.6                                                                 | 49.9                                              | <0.001 <sup>¥</sup> | 33.7                                                                 | 49.6                                              | <0.001 <sup>¥</sup> |
| Anti-lipid medications                                                    | 49.6         | 44.2                                                                   | 38.5                                                                 | 62.5                                              | <0.001 <sup>¥</sup> | 39.6                                                                 | 62.1                                              | <0.001 <sup>¥</sup> |
| Anti-diabetic*                                                            | 38.4         | 44.7                                                                   | 13.8                                                                 | 33.9                                              | <0.001 <sup>¥</sup> | 15.2                                                                 | 33.4                                              | <0.001 <sup>¥</sup> |
| Biguanides                                                                | 34.6         | 39.8                                                                   | 11.6                                                                 | 31.6                                              | <0.001 <sup>¥</sup> | 12.9                                                                 | 31.2                                              | <0.001 <sup>¥</sup> |
| Sulphonylureas                                                            | 8.5          | 11.4                                                                   | 2.7                                                                  | 4.7                                               | <0.001 <sup>¥</sup> | 3.2                                                                  | 4.6                                               | <0.001 <sup>¥</sup> |
| Insulin                                                                   | 2.7          | 3.5                                                                    | 1.8                                                                  | 1.4                                               | <0.001 <sup>¥</sup> | 2.0                                                                  | 1.4                                               | <0.001 <sup>¥</sup> |
| Other                                                                     | 0.1          | 0.1                                                                    | 0.1                                                                  | 0.2                                               | 0.025 <sup>¥</sup>  | 0.1                                                                  | 0.2                                               | 0.006 <sup>¥</sup>  |
| Anti-platelet                                                             | 27.0         | 24.2                                                                   | 22.9                                                                 | 33.1                                              | <0.001 <sup>¥</sup> | 23.9                                                                 | 32.8                                              | <0.001 <sup>¥</sup> |
| Number of primary care visits in the year before T2D diagnosis; mean (SD) | 12.9 (11.7)  | 11.1 (10.9)                                                            | 17.2 (13.8)                                                          | 14.9 (11.8)                                       | <0.001 <sup>Ω</sup> | 16.9 (13.6)                                                          | 15.0 (11.9)                                       | <0.001 <sup>Ω</sup> |
| Index of Multiple Deprivation quintiles (%)                               |              |                                                                        |                                                                      |                                                   |                     |                                                                      |                                                   |                     |
| 1 Q - least deprived                                                      | 14.1         | 14.6                                                                   | 12.7                                                                 | 13.5                                              | <0.001 <sup>¥</sup> | 12.6                                                                 | 13.5                                              | <0.001 <sup>¥</sup> |
| 2 Q                                                                       | 19.1         | 19.5                                                                   | 19.4                                                                 | 18.3                                              |                     | 19.2                                                                 | 18.3                                              |                     |
| 3 Q                                                                       | 19.0         | 19.1                                                                   | 17.2                                                                 | 19.4                                              |                     | 17.6                                                                 | 19.3                                              |                     |
| 4 Q                                                                       | 22.3         | 21.1                                                                   | 23.4                                                                 | 24.2                                              | <0.001 <sup>¥</sup> | 23.1                                                                 | 24.3                                              | <0.001 <sup>¥</sup> |
| 5 Q - most deprived                                                       | 25.6         | 25.8                                                                   | 27.3                                                                 | 24.6                                              |                     | 27.4                                                                 | 24.6                                              |                     |

**Supplementary Table S4. Characteristics of individuals with pre-diabetes stratified by having a diagnostic code for pre-diabetes recorded. Results are presented using WHO/IEC, NICE, and ADA criteria for the definition of pre-diabetes.**

**Notes:** Clinical data within three years before the diagnosis of Type 2 diabetes were used to define the detection of pre-diabetes. For each diagnostic criteria (WHO/IEC, NICE, and ADA), p-values from Chi-square and ANOVA tests, as appropriate, are reported in the last columns for comparisons between two groups: diagnostic code recorded for pre-diabetes and pre-diabetes without a diagnostic label recorded for pre-diabetes.

Abbreviations: T2D: Type 2 diabetes FPG: fasting plasma glucose, OGTT: glucose tolerance test (2-hour after 75 g glucose load), ACE: Angiotensin-converting-enzyme inhibitor, ArB: Antiotensin II receptor blockers.

WHO/IEC criteria to define pre-diabetes: FPG: 6.1-6.9 mmol/L, OGTT 7.8-11.1 mmol/L, HbA1c 42 to 47 mmol/mol or 6.0-6.4%

NICE criteria to define pre-diabetes: 5.5-6.9 mmol/L, OGTT 7.8-11.1 mmol/L, HbA1c 42 to 47 mmol/mol or 6.0-6.4%

ADA criteria to define pre-diabetes: FPG: 5.6-6.9 mmol/L, OGTT 7.8-11.1 mmol/L, HbA1c 39 to 47 mmol/mol or 5.7-6.4%

¥Chi-square test for the comparison of groups with and without a diagnostic label recorded for pre-diabetes

§ANOVA test for the comparison of groups with and without a diagnostic label recorded for pre-diabetes

ΩKruskal-Wallis test was performed to assess the unadjusted difference between groups

\* Medication groups are not mutually exclusive and patients with multiple medications prescribed are counted multiple times.



|                                                                 | WHO/IEC DIAGNOSTIC CRITERIA <sup>1</sup>                                                    |                                                                                         |                     | NICE DIAGNOSTIC CRITERIA <sup>2</sup>                                                       |                                                                                         |                     | ADA DIAGNOSTIC CRITERIA <sup>3</sup>                                                        |                                                                                         |                     |
|-----------------------------------------------------------------|---------------------------------------------------------------------------------------------|-----------------------------------------------------------------------------------------|---------------------|---------------------------------------------------------------------------------------------|-----------------------------------------------------------------------------------------|---------------------|---------------------------------------------------------------------------------------------|-----------------------------------------------------------------------------------------|---------------------|
|                                                                 | Tested before the diagnosis of T2D (pre-diabetes detected without diagnostic code assigned) | Tested before the diagnosis of T2D (pre-diabetes detected and diagnostic code assigned) | p-values            | Tested before the diagnosis of T2D (pre-diabetes detected without diagnostic code assigned) | Tested before the diagnosis of T2D (pre-diabetes detected and diagnostic code assigned) | p-values            | Tested before the diagnosis of T2D (pre-diabetes detected without diagnostic code assigned) | Tested before the diagnosis of T2D (pre-diabetes detected and diagnostic code assigned) | p-values            |
| N                                                               | 23,459                                                                                      | 20,426                                                                                  |                     | 30,930                                                                                      | 20,426                                                                                  |                     | 31,044                                                                                      | 20,426                                                                                  |                     |
| %                                                               | 53.5                                                                                        | 46.5                                                                                    |                     | 60.2                                                                                        | 39.8                                                                                    |                     | 60.3                                                                                        | 39.7                                                                                    |                     |
| Type of glycaemic measures recorded before diagnosis of T2D (%) |                                                                                             |                                                                                         |                     |                                                                                             |                                                                                         |                     |                                                                                             |                                                                                         |                     |
| FPG                                                             | 81.2                                                                                        | 66.5                                                                                    |                     | 85.8                                                                                        | 66.5                                                                                    |                     | 80.40                                                                                       | 66.50                                                                                   |                     |
| HbA1C                                                           | 60.5                                                                                        | 55.5                                                                                    |                     | 53.6                                                                                        | 55.50                                                                                   |                     | 58.80                                                                                       | 55.50                                                                                   |                     |
| OGTT                                                            | 21.1                                                                                        | 24.3                                                                                    |                     | 18.3                                                                                        | 24.30                                                                                   |                     | 17.80                                                                                       | 24.30                                                                                   |                     |
| Multiple tests                                                  | 55.3                                                                                        | 50.3                                                                                    |                     | 51.2                                                                                        | 50.30                                                                                   |                     | 50.70                                                                                       | 50.30                                                                                   |                     |
| Time from testing to diagnosis of T2D, months; mean (SD)        | 32.8 (6.4)                                                                                  | 33.2 (6.8)                                                                              |                     | 33.0 (6.0)                                                                                  | 33.2 (5.8)                                                                              |                     | 32.8 (6.4)                                                                                  | 33.2 (5.8)                                                                              |                     |
| Female (%)                                                      | 47.1                                                                                        | 46.3                                                                                    | 0.086 <sup>¥</sup>  | 47.6                                                                                        | 46.3                                                                                    | 0.004 <sup>¥</sup>  | 48                                                                                          | 46.3                                                                                    | <0.001 <sup>¥</sup> |
| Age, years (SD)                                                 | 64.4 (12.8)                                                                                 | 64.2 (12.4)                                                                             | 0.137 <sup>§</sup>  | 64.1 (13.0)                                                                                 | 64.2 (12.4)                                                                             | 0.189 <sup>§</sup>  | 64.2 (13)                                                                                   | 64.2 (12.4)                                                                             | 0.667 <sup>§</sup>  |
| Ethnicity (%)                                                   |                                                                                             |                                                                                         |                     |                                                                                             |                                                                                         |                     |                                                                                             |                                                                                         |                     |
| White                                                           | 82.4                                                                                        | 83.5                                                                                    |                     | 82.8                                                                                        | 83.5                                                                                    |                     | 82.7                                                                                        | 83.5                                                                                    |                     |
| South Asian                                                     | 4.8                                                                                         | 3.8                                                                                     |                     | 4.9                                                                                         | 3.8                                                                                     |                     | 4.8                                                                                         | 3.8                                                                                     |                     |
| Black                                                           | 2.7                                                                                         | 2.6                                                                                     | <0.001 <sup>¥</sup> | 2.8                                                                                         | 2.6                                                                                     | <0.001 <sup>¥</sup> | 2.8                                                                                         | 2.6                                                                                     | <0.001 <sup>¥</sup> |
| Other                                                           | 3.4                                                                                         | 3.2                                                                                     |                     | 3.4                                                                                         | 3.2                                                                                     |                     | 3.4                                                                                         | 3.2                                                                                     |                     |
| Unknown                                                         | 6.7                                                                                         | 7.1                                                                                     |                     | 6.2                                                                                         | 7.0                                                                                     |                     | 6.3                                                                                         | 7.0                                                                                     |                     |
| Smoking status (%)                                              |                                                                                             |                                                                                         |                     |                                                                                             |                                                                                         |                     |                                                                                             |                                                                                         |                     |
| Non-smoker                                                      | 32.6                                                                                        | 32                                                                                      |                     | 16.7                                                                                        | 15.7                                                                                    |                     | 32.8                                                                                        | 32                                                                                      |                     |
| Ex-smoker                                                       | 50.9                                                                                        | 52.3                                                                                    | 0.002 <sup>¥</sup>  | 36.2                                                                                        | 37.5                                                                                    | 0.002 <sup>¥</sup>  | 50.4                                                                                        | 52.3                                                                                    | <0.001 <sup>¥</sup> |
| Current smoker                                                  | 16.5                                                                                        | 15.7                                                                                    |                     | 47.1                                                                                        | 46.8                                                                                    |                     | 16.8                                                                                        | 15.7                                                                                    |                     |

(continued)

|                                                                           | WHO/IEC DIAGNOSTIC CRITERIA <sup>1</sup>                                                                |                                                                                                     |                     | NICE DIAGNOSTIC CRITERIA <sup>2</sup>                                                                   |                                                                                                     |                     | ADA DIAGNOSTIC CRITERIA <sup>3</sup>                                                                    |                                                                                                     |                     |
|---------------------------------------------------------------------------|---------------------------------------------------------------------------------------------------------|-----------------------------------------------------------------------------------------------------|---------------------|---------------------------------------------------------------------------------------------------------|-----------------------------------------------------------------------------------------------------|---------------------|---------------------------------------------------------------------------------------------------------|-----------------------------------------------------------------------------------------------------|---------------------|
|                                                                           | Tested before the diagnosis of Type 2 diabetes (pre-diabetes detected without diagnostic code assigned) | Tested before the diagnosis of Type 2 diabetes (pre-diabetes detected and diagnostic code assigned) | p-values            | Tested before the diagnosis of Type 2 diabetes (pre-diabetes detected without diagnostic code assigned) | Tested before the diagnosis of Type 2 diabetes (pre-diabetes detected and diagnostic code assigned) | p-values            | Tested before the diagnosis of Type 2 diabetes (pre-diabetes detected without diagnostic code assigned) | Tested before the diagnosis of Type 2 diabetes (pre-diabetes detected and diagnostic code assigned) | p-values            |
| HbA1c at diagnosis, mmol/mol; mean (SD)                                   | 49.4 (18.3)                                                                                             | 51.1 (19.6)                                                                                         | <0.001 <sup>§</sup> | 50.8 (19.7)                                                                                             | 50.8 (19.7)                                                                                         | 0.001 <sup>§</sup>  | 49.7 (18.2)                                                                                             | 51.1 (19.6)                                                                                         | <0.001 <sup>§</sup> |
| BMI, kg/m <sup>2</sup> ; mean (SD)                                        | 31.3 (6.5)                                                                                              | 31.4 (6.4)                                                                                          | 0.016 <sup>§</sup>  | 31.2 (6.7)                                                                                              | 31.4 (6.4)                                                                                          | <0.001 <sup>§</sup> | 31.1 (6.6)                                                                                              | 31.4 (6.4)                                                                                          | <0.001 <sup>§</sup> |
| SBP, mm Hg; mean (SD)                                                     | 137.4 (14.7)                                                                                            | 137.4 (13.9)                                                                                        | 0.952 <sup>§</sup>  | 137.1 (14.8)                                                                                            | 137.4 (13.9)                                                                                        | 0.021 <sup>§</sup>  | 137.1 (14.8)                                                                                            | 137.4 (13.9)                                                                                        | <0.001 <sup>§</sup> |
| DBP, mm Hg; mean (SD)                                                     | 79.4 (8.9)                                                                                              | 79.5 (4.9)                                                                                          | 0.397 <sup>§</sup>  | 79.4 (8.9)                                                                                              | 79.5 (8.6)                                                                                          | 0.297 <sup>§</sup>  | 79.3 (8.9)                                                                                              | 79.5 (8.6)                                                                                          | 0.049 <sup>§</sup>  |
| Total cholesterol, mmol/L; mean (SD)                                      | 4.9 (1.1)                                                                                               | 4.9 (1.1)                                                                                           | 0.027 <sup>§</sup>  | 4.9 (1.1)                                                                                               | 4.9 (1.1)                                                                                           | 0.013 <sup>§</sup>  | 4.9 (1.1)                                                                                               | 4.9 (1.1)                                                                                           | <0.001 <sup>§</sup> |
| Number of chronic diseases; mean (SD)                                     | 3.1 (2.0)                                                                                               | 3.1 (2.0)                                                                                           | 0.006 <sup>Ω</sup>  | 3.1 (2.1)                                                                                               | 3.1 (2.0)                                                                                           | 0.883 <sup>Ω</sup>  | 3.1 (2.1)                                                                                               | 3.1 (2.0)                                                                                           | 0.831 <sup>Ω</sup>  |
| Medications (%)                                                           |                                                                                                         |                                                                                                     |                     |                                                                                                         |                                                                                                     |                     |                                                                                                         |                                                                                                     |                     |
| Anti-hypertensive                                                         | 67.6                                                                                                    | 67.5                                                                                                | 0.689 <sup>¥</sup>  | 66.9                                                                                                    | 67.5                                                                                                | 0.203 <sup>¥</sup>  | 66.4                                                                                                    | 67.5                                                                                                | 0.015 <sup>¥</sup>  |
| ACEi/ARBs                                                                 | 50                                                                                                      | 50.5                                                                                                | 0.306 <sup>¥</sup>  | 49.5                                                                                                    | 50.4                                                                                                | 0.035 <sup>¥</sup>  | 49                                                                                                      | 50.5                                                                                                | 0.001 <sup>¥</sup>  |
| Anti-lipid medications                                                    | 62.7                                                                                                    | 64                                                                                                  | 0.007 <sup>¥</sup>  | 61.6                                                                                                    | 64                                                                                                  | <0.001 <sup>¥</sup> | 61                                                                                                      | 64                                                                                                  | <0.001 <sup>¥</sup> |
| Anti-diabetic*                                                            | 33.5                                                                                                    | 35.5                                                                                                | <0.001 <sup>¥</sup> | 32.8                                                                                                    | 35.5                                                                                                | <0.001 <sup>¥</sup> | 32.1                                                                                                    | 35.4                                                                                                | <0.001 <sup>¥</sup> |
| Biguanides                                                                | 31.5                                                                                                    | 33.2                                                                                                | 0.001 <sup>¥</sup>  | 30.6                                                                                                    | 33.2                                                                                                | <0.001 <sup>¥</sup> | 29.9                                                                                                    | 33.2                                                                                                | <0.001 <sup>¥</sup> |
| Sulphonylureas                                                            | 4.3                                                                                                     | 4.7                                                                                                 | 0.052 <sup>¥</sup>  | 4.7                                                                                                     | 4.7                                                                                                 | 0.914 <sup>¥</sup>  | 4.5                                                                                                     | 4.7                                                                                                 | 0.237 <sup>¥</sup>  |
| Insulin                                                                   | 1.2                                                                                                     | 1.3                                                                                                 | 0.123 <sup>¥</sup>  | 1.5                                                                                                     | 1.3                                                                                                 | 0.050 <sup>¥</sup>  | 1.4                                                                                                     | 1.3                                                                                                 | 0.415 <sup>¥</sup>  |
| Other                                                                     | 0.1                                                                                                     | 0.2                                                                                                 | 0.100 <sup>¥</sup>  | 0.1                                                                                                     | 0.2                                                                                                 | 0.055 <sup>¥</sup>  | 0.15                                                                                                    | 0.21                                                                                                | 0.147 <sup>¥</sup>  |
| Anti-platelet                                                             | 33.0                                                                                                    | 33.3                                                                                                | 0.524               | 33.0                                                                                                    | 33.3                                                                                                | 0.491               | 32.5                                                                                                    | 33.3                                                                                                | 0.064               |
| Number of primary care visits in the year before T2D diagnosis; mean (SD) | 14.3 (11.7)                                                                                             | 15.2 (11.6)                                                                                         | <0.001 <sup>§</sup> | 14.7 (12.0)                                                                                             | 15.2 (11.6)                                                                                         | <0.001 <sup>§</sup> | 14.8 (12.1)                                                                                             | 15.2 (11.6)                                                                                         | 0.002 <sup>§</sup>  |
| Index of Multiple Deprivation quintiles (%)                               |                                                                                                         |                                                                                                     |                     |                                                                                                         |                                                                                                     |                     |                                                                                                         |                                                                                                     |                     |
| 1 Q - least deprived                                                      | 13.1                                                                                                    | 14.4                                                                                                | <0.001 <sup>¥</sup> | 13                                                                                                      | 14.4                                                                                                | <0.001 <sup>¥</sup> | 13                                                                                                      | 14.4                                                                                                | <0.001 <sup>¥</sup> |
| 2 Q                                                                       | 17.5                                                                                                    | 19                                                                                                  | <0.001 <sup>¥</sup> | 17.7                                                                                                    | 19                                                                                                  | <0.001 <sup>¥</sup> | 17.8                                                                                                    | 19                                                                                                  | <0.001 <sup>¥</sup> |

|                     |      |      |      |      |      |      |
|---------------------|------|------|------|------|------|------|
| 3 Q                 | 19.7 | 19.2 | 19.5 | 19.2 | 19.4 | 19.2 |
| 4 Q                 | 25.4 | 22.8 | 25.2 | 22.8 | 25.3 | 22.8 |
| 5 Q - most deprived | 24.3 | 24.7 | 24.6 | 24.7 | 24.6 | 24.7 |

**Supplementary Table S5. Glycaemic measures recorded in the three years before the diagnosis of Type 2 diabetes between 2004 and 2011 and between 2012 and 2017 in the study population**

**Notes:** WHO/IEC, NICE, and ADA criteria were used for the detection of pre-diabetes. Results are presented for two time periods based on the date of the diagnosis of Type 2 diabetes: 2004 to 2011 and 2012 to 2017 due to changes in the national clinical guidelines in the UK introducing HbA1c as additional blood glucose testing method for the testing and detection of pre-diabetes.

WHO/IEC criteria to define pre-diabetes: FPG: 6.1-6.9 mmol/L, OGTT 7.8-11.1 mmol/L, HbA1c 42 to 47 mmol/mol or 6.0-6.4%

NICE criteria to define pre-diabetes: 5.5-6.9 mmol/L, OGTT 7.8-11.1 mmol/L, HbA1c 42 to 47 mmol/mol or 6.0-6.4%

ADA criteria to define pre-diabetes: FPG: 5.6-6.9 mmol/L, OGTT 7.8-11.1 mmol/L, HbA1c 39 to 47 mmol/mol or 5.7-6.4%

Abbreviations: T2D: Type 2 diabetes FPG: fasting plasma glucose, OGTT: glucose tolerance test (2-hour after 75 g glucose load).

|                                                                                 | Glycaemic values within the normal range before the diagnosis of T2D |                   |                  | Pre-diabetes detected before the diagnosis of T2D |                   |                  |
|---------------------------------------------------------------------------------|----------------------------------------------------------------------|-------------------|------------------|---------------------------------------------------|-------------------|------------------|
|                                                                                 | DIAGNOSTIC CRITERIA                                                  |                   |                  | DIAGNOSTIC CRITERIA                               |                   |                  |
|                                                                                 | WHO/IEC <sup>1</sup>                                                 | NICE <sup>2</sup> | ADA <sup>3</sup> | WHO/IEC <sup>1</sup>                              | NICE <sup>2</sup> | ADA <sup>3</sup> |
| <b>Type 2 diabetes diagnosed from 2004 to 2011</b>                              |                                                                      |                   |                  |                                                   |                   |                  |
| N                                                                               | 11,567                                                               | 7,086             | 7,695            | 27,121                                            | 31,602            | 30,993           |
| TYPE OF GLYCAEMIC MEASURES RECORDED BEFORE THE DIAGNOSIS OF TYPE 2 DIABETES (%) |                                                                      |                   |                  |                                                   |                   |                  |
| FPG                                                                             | 87.8%                                                                | 80.1%             | 87.9%            | 77.7%                                             | 80.9%             | 78.9%            |
| HbA1C                                                                           | 25.7%                                                                | 29.5%             | 21.6%            | 42.5%                                             | 39.3%             | 41.5%            |
| OGTT                                                                            | 6.4%                                                                 | 2.9%              | 4.2%             | 26.7%                                             | 24.6%             | 24.7%            |
| Multiple tests                                                                  | 18.6%                                                                | 11.7%             | 12.6%            | 48.7%                                             | 46.0%             | 46.4%            |
| <b>Type 2 diabetes diagnosed from 2012 to 2017</b>                              |                                                                      |                   |                  |                                                   |                   |                  |
| N                                                                               | 10,335                                                               | 7,345             | 6,622            | 16,764                                            | 19,754            | 20,477           |
| TYPE OF GLYCAEMIC MEASURES RECORDED BEFORE THE DIAGNOSIS OF TYPE 2 DIABETES (%) |                                                                      |                   |                  |                                                   |                   |                  |
| FPG                                                                             | 75.6%                                                                | 65.7%             | 80.1%            | 69.0%                                             | 73.7%             | 68.7%            |
| HbA1C                                                                           | 52.6%                                                                | 53.8%             | 40.8%            | 83.4%                                             | 78.3%             | 81.7%            |
| OGTT                                                                            | 2.4%                                                                 | 1.2%              | 1.5%             | 15.9%                                             | 14.3%             | 13.7%            |
| Multiple tests                                                                  | 29.4%                                                                | 20.2%             | 21.9%            | 59.9%                                             | 58.7%             | 56.8%            |
| <b>Type 2 diabetes diagnosed from 2004 to 2017</b>                              |                                                                      |                   |                  |                                                   |                   |                  |
| N                                                                               | 21,902                                                               | 14,431            | 14,317           | 43,885                                            | 51,356            | 51,470           |
| TYPE OF GLYCAEMIC MEASURES RECORDED BEFORE THE DIAGNOSIS OF TYPE 2 DIABETES (%) |                                                                      |                   |                  |                                                   |                   |                  |
| FPG                                                                             | 82.1%                                                                | 72.8%             | 84.3%            | 74.4%                                             | 78.1%             | 74.9%            |
| HbA1C                                                                           | 38.4%                                                                | 41.9%             | 30.5%            | 58.2%                                             | 54.3%             | 57.5%            |

---

|                |       |       |       |       |       |       |
|----------------|-------|-------|-------|-------|-------|-------|
| OGTT           | 4.5%  | 2.0%  | 3.0%  | 22.6% | 20.6% | 20.3% |
| Multiple tests | 23.7% | 16.0% | 16.9% | 53.0% | 50.9% | 50.5% |

---

**Supplementary Figure S6. Prevalence of microvascular (retinopathy and nephropathy) and macrovascular (acute coronary syndrome, cerebrovascular, and peripheral arterial disease) disease present at time of the diagnosis of Type 2 diabetes according to pre-diabetes status in the three years before the diagnosis of Type 2 diabetes.**

**Notes:** A microvascular complication was considered being present at time of Type 2 diabetes diagnosis if the complication was diagnosed between five years before and fifteen months after the diagnosis of Type 2 diabetes. A macrovascular complication was considered being present at time of Type 2 diabetes diagnosis if the complication was diagnosed any time before the diagnosis and during the year following the diagnosis of Type 2 diabetes. 1) WHO/IEC criteria: FPG: 6.1-6.9 mmol/L, OGTT 7.8-11.1 mmol/L, HbA1c 42 to 47 mmol/mol or 6.0-6.4%; 2) NICE criteria: 5.5-6.9 mmol/L, OGTT 7.8-11.1 mmol/L, HbA1c 42 to 47 mmol/mol or 6.0-6.4%; 3) ADA criteria: FPG: 5.6-6.9 mmol/L, OGTT 7.8-11.1 mmol/L, HbA1c 39 to 47 mmol/mol or 5.7-6.4%.

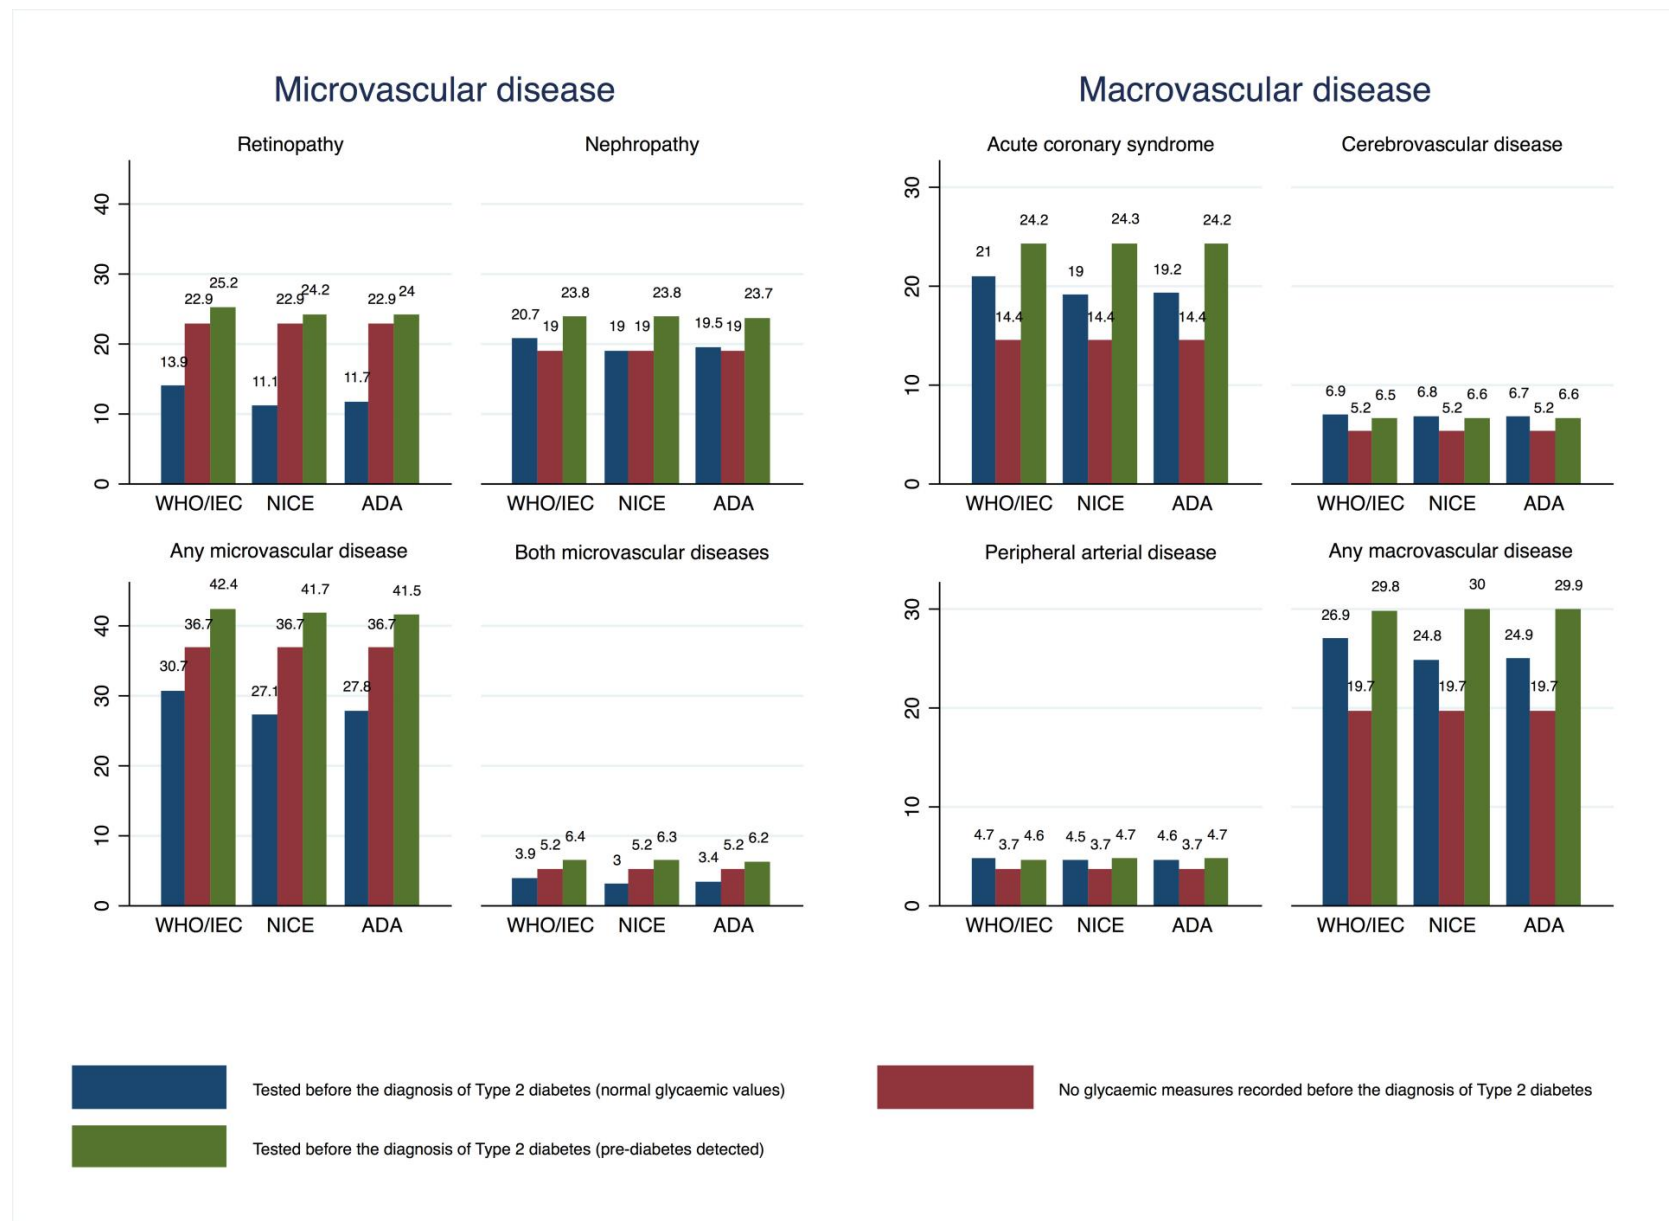



**Supplementary Figure S7. Prevalence of microvascular (retinopathy and nephropathy) and macrovascular (acute coronary syndrome, cerebrovascular, and peripheral arterial disease) disease present at time of the diagnosis of Type 2 diabetes according to pre-diabetes status in the three years before the diagnosis of Type 2 diabetes. Individuals with pre-diabetes were further classified into two groups based on whether a diagnostic code for pre-diabetes was recorded in their health records at time of pre-diabetes detection.**

**Notes:** A microvascular complication was defined as being present at time of Type 2 diabetes diagnosis if the complication was diagnosed between five years before and fifteen months after the diagnosis of Type 2 diabetes. A macrovascular complication was defined as being present at time of Type 2 diabetes diagnosis if the complication was diagnosed any time before the diagnosis and during the year of diagnosis of Type 2 diabetes. 1) WHO/IEC criteria: FPG: 6.1-6.9 mmol/L, OGTT 7.8-11.1 mmol/L, HbA1c 42 to 47 mmol/mol or 6.0-6.4%;

2) NICE criteria: 5.5-6.9 mmol/L, OGTT 7.8-11.1 mmol/L, HbA1c 42 to 47 mmol/mol or 6.0-6.4%;

3) ADA criteria: FPG: 5.6-6.9 mmol/L, OGTT 7.8-11.1 mmol/L, HbA1c 39 to 47 mmol/mol or 5.7-6.4%.

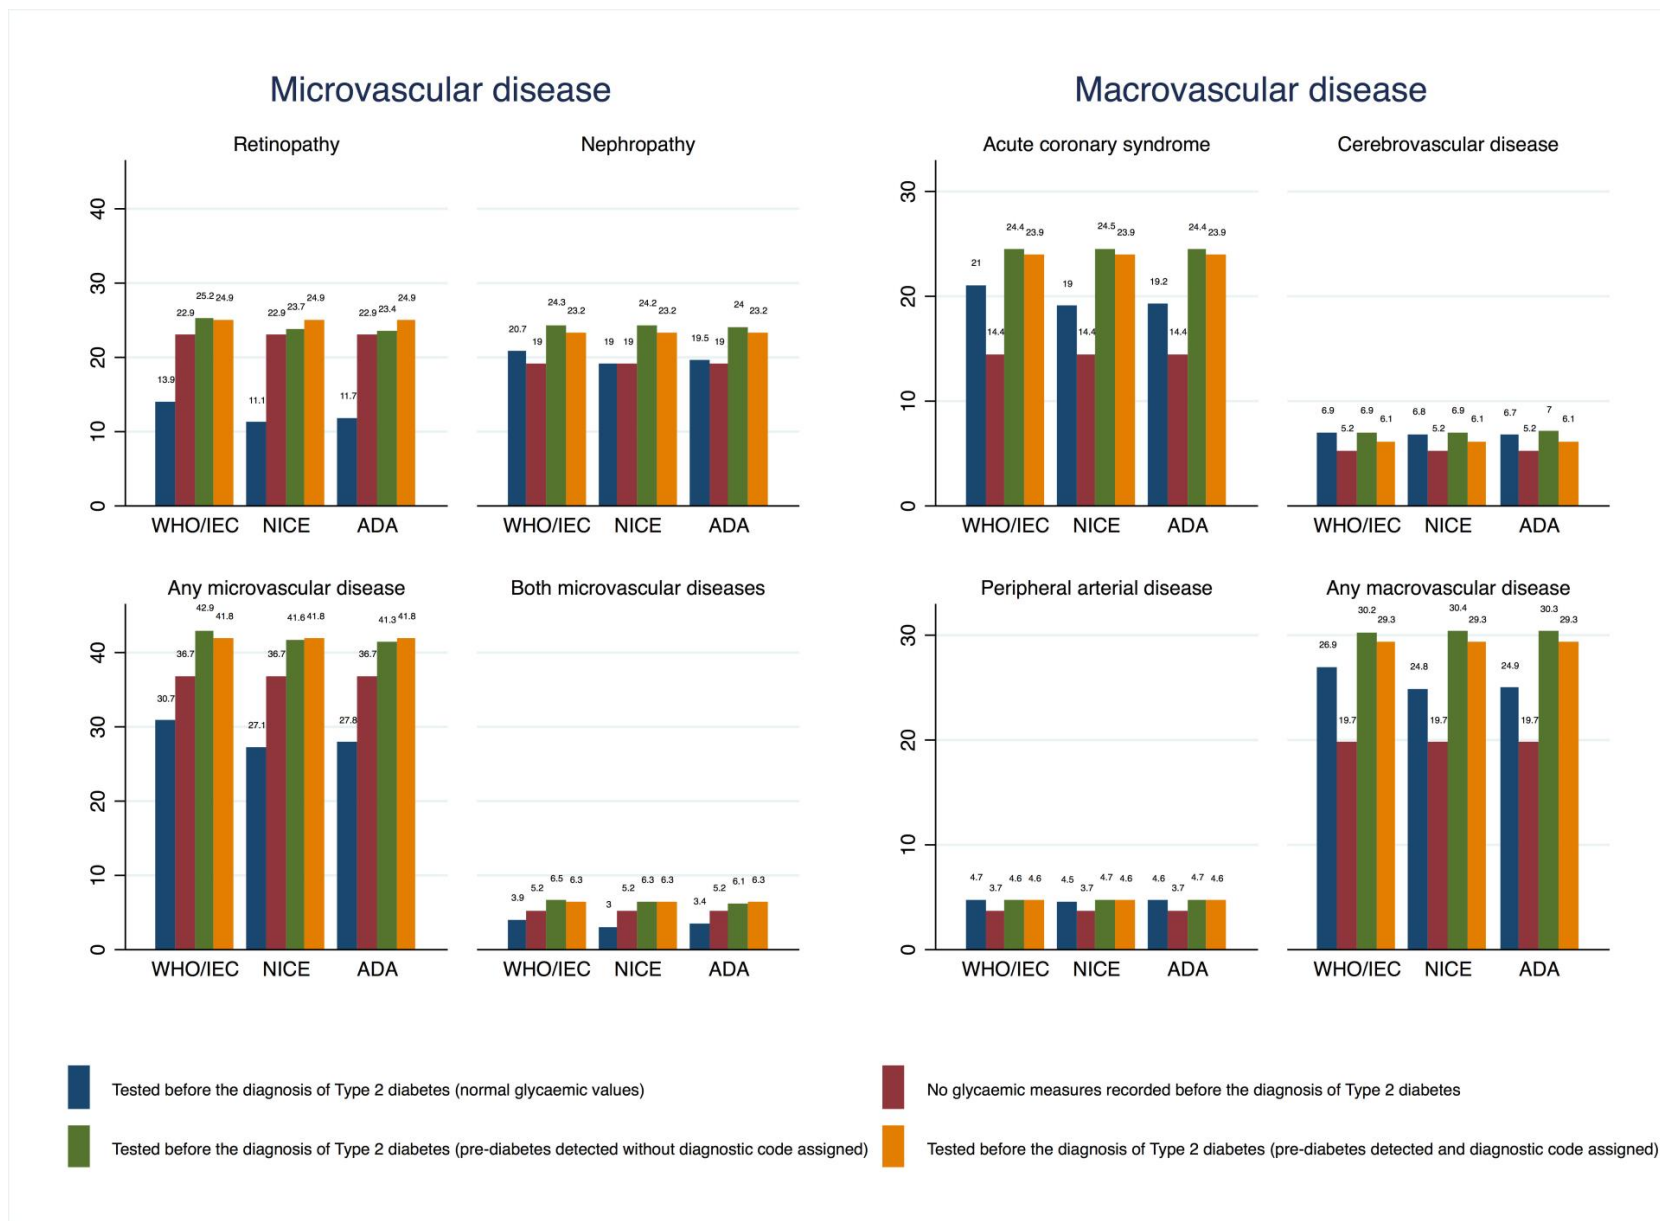

**Supplementary Figure S8. Association between glycaemic testing and detection of pre-diabetes and presence of microvascular disease at the time of diagnosis of Type 2 diabetes**

**Notes:** Adjusted Odds Ratios (AOR) and 95% confidence intervals (95% CI) have been estimated employing multivariable logistic regression models adjusted for age, sex, ethnicity (White, South Asian, Black, Other, Unknown), smoking status (non-smoker, ex-smoker, smoker), total cholesterol, systolic and diastolic blood pressure, number of co-existing chronic conditions, number of primary care visits in the previous year, general practice index of multiple deprivation, and year of diagnosis of Type 2 diabetes. Abbreviations: T2D: Type 2 diabetes.

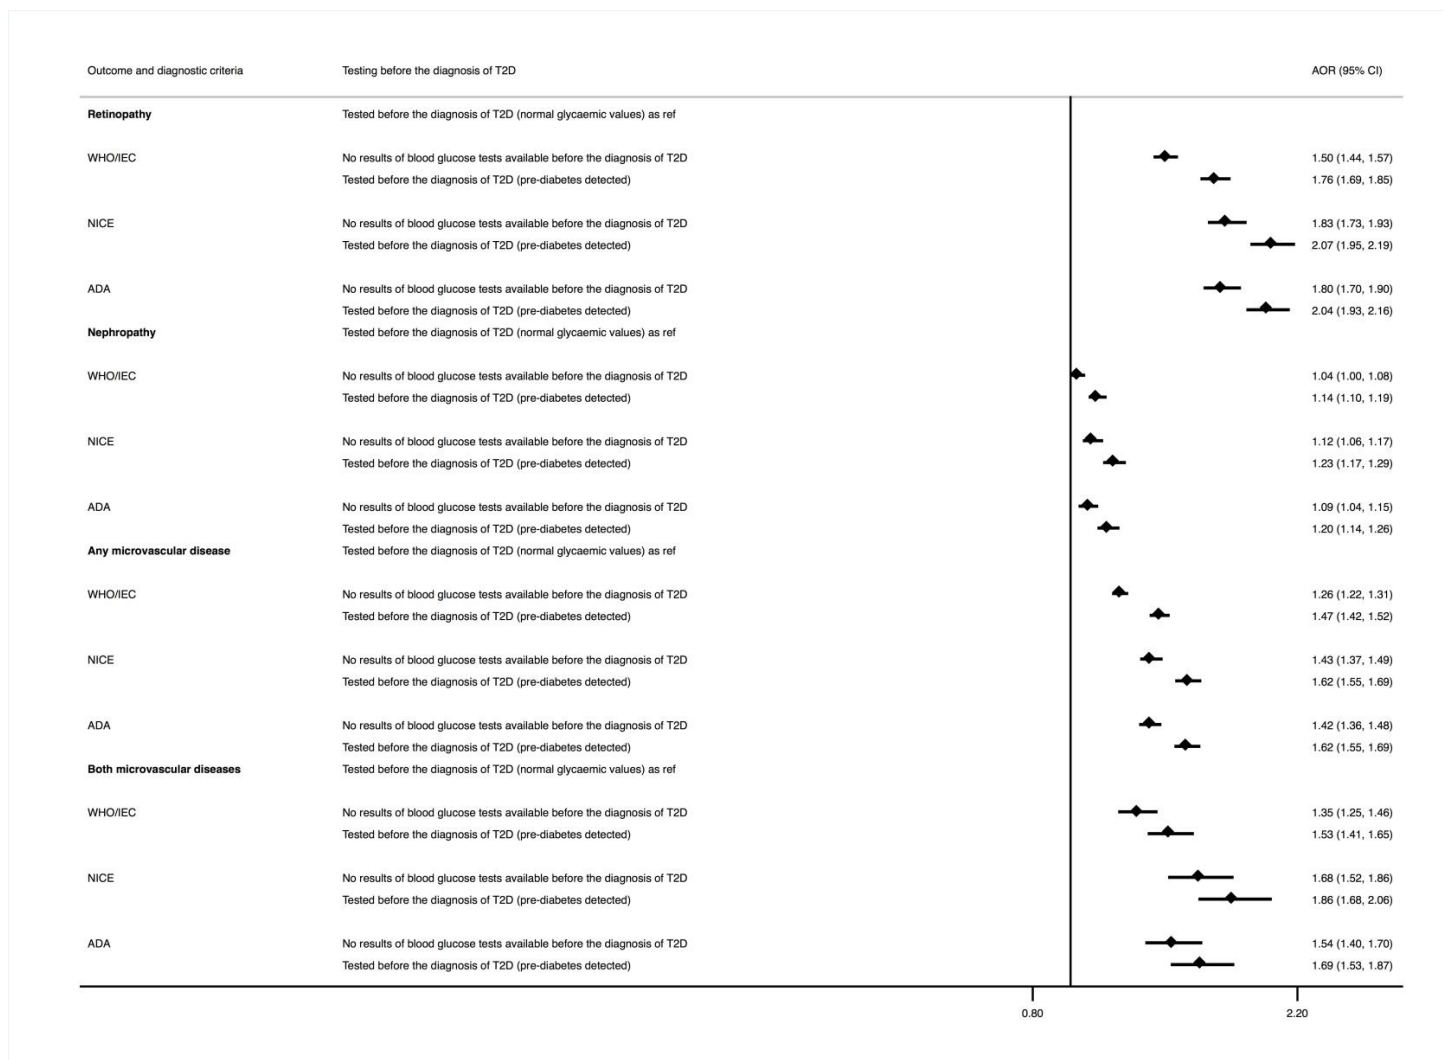

**Supplementary Figure S9. Association between glycaemic testing and detection of pre-diabetes and presence of macrovascular disease at the time of diagnosis of Type 2 diabetes**

**Notes:** Adjusted Odds Ratios (AOR) and 95% confidence intervals (95% CI) have been estimated employing multivariable logistic regression models adjusted for age, sex, ethnicity (White, South Asian, Black, Other, Unknown), smoking status (non-smoker, ex-smoker, smoker), total cholesterol, systolic and diastolic blood pressure, number of co-existing chronic conditions, number of primary care visits in the previous year, general practice index of multiple deprivation, and year of diagnosis of Type 2 diabetes. Abbreviations: T2D: Type 2 diabetes.

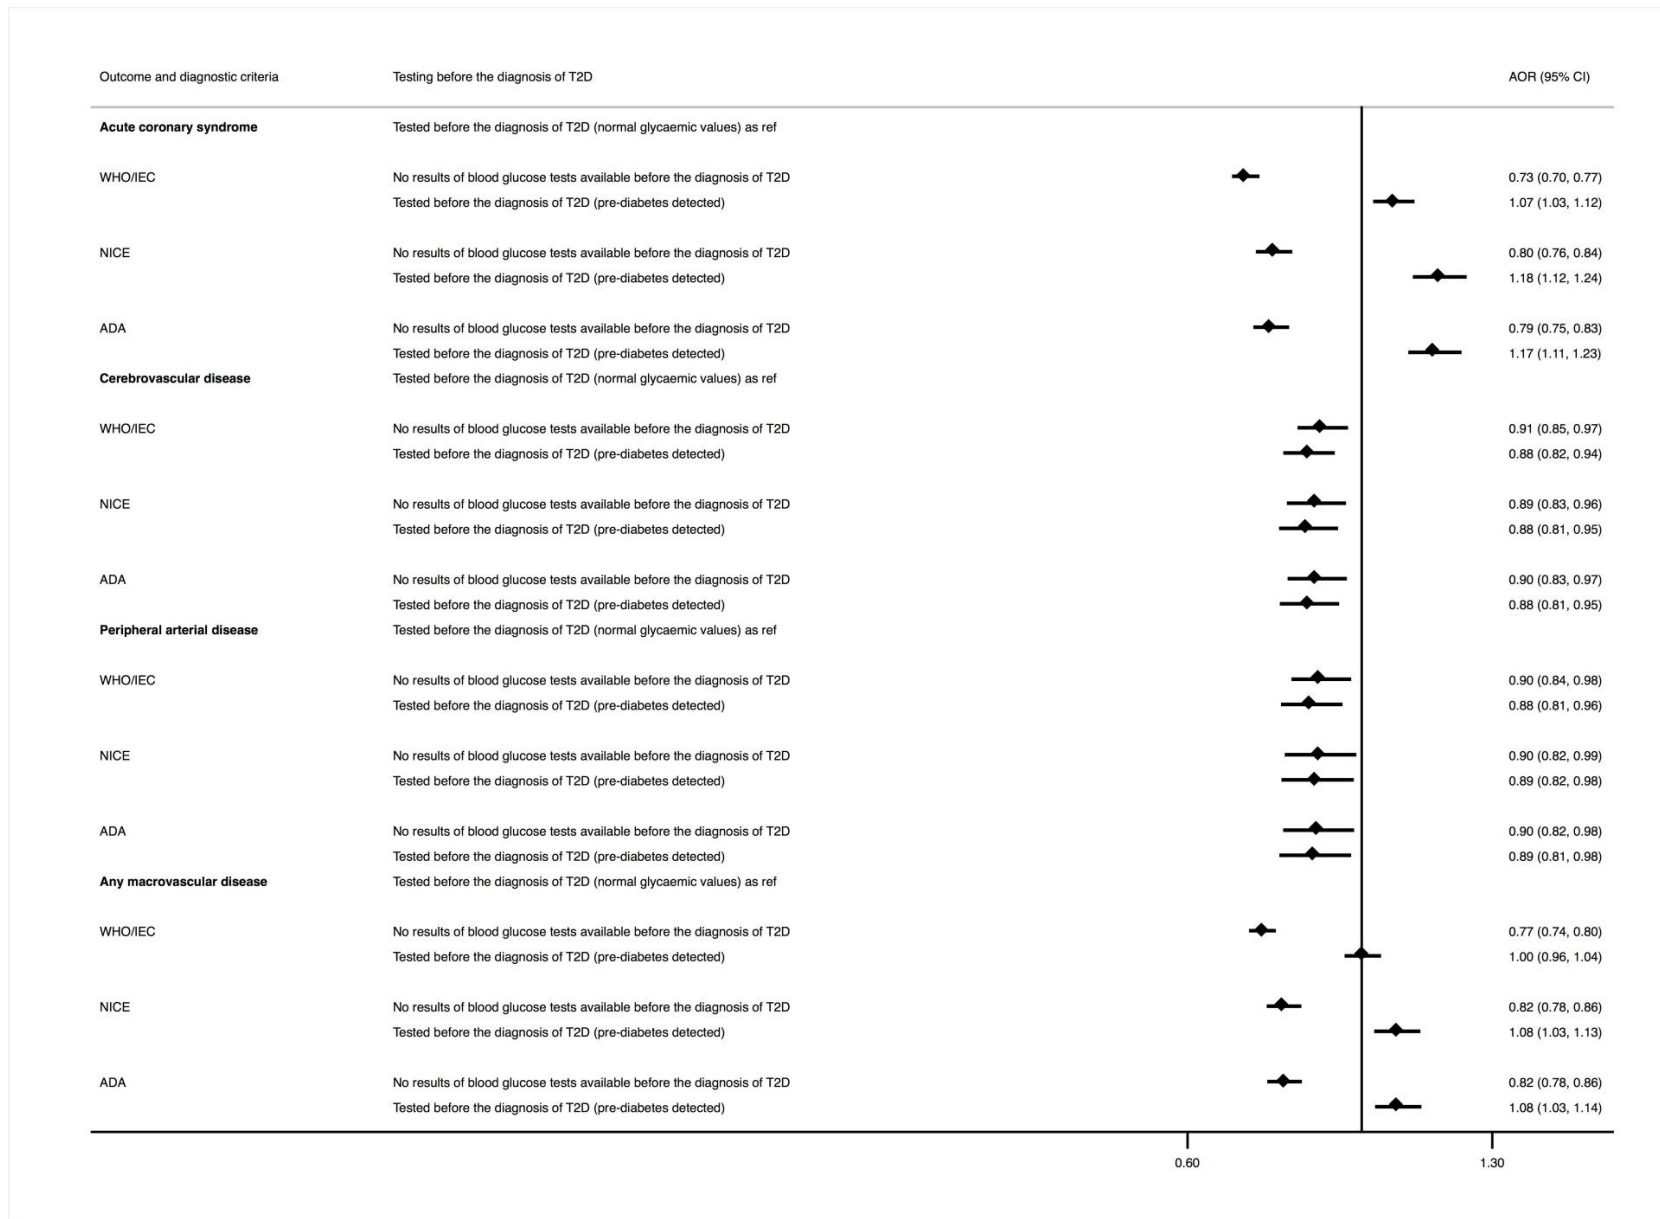

**Supplementary Figure S10. Association between glycaemic testing and detection of pre-diabetes and the presence of microvascular disease at the time of diagnosis of Type 2 diabetes.**

**Notes:** Adjusted Odds Ratios (AOR) and 95% confidence intervals (95% CI) have been estimated employing multivariable logistic regression models adjusted for age, sex, ethnicity (White, South Asian, Black, Other, Unknown), smoking status (non-smoker, ex-smoker, smoker), total cholesterol, systolic and diastolic blood pressure, number of co-existing chronic conditions, number of primary care visits in the previous year, general practice index of multiple deprivation, and year of diagnosis of Type 2 diabetes. Abbreviations: T2D: Type 2 diabetes.

1. WHO/IEC criteria to define pre-diabetes: FPG: 6.1-6.9 mmol/L, OGTT 7.8-11.1 mmol/L, HbA1c 42 to 47 mmol/mol or 6.0-6.4%
2. NICE criteria to define pre-diabetes: 5.5-6.9 mmol/L, OGTT 7.8-11.1 mmol/L, HbA1c 42 to 47 mmol/mol or 6.0-6.4%
3. ADA criteria to define pre-diabetes: FPG: 5.6-6.9 mmol/L, OGTT 7.8-11.1 mmol/L, HbA1c 39 to 47 mmol/mol or 5.7-6.4%

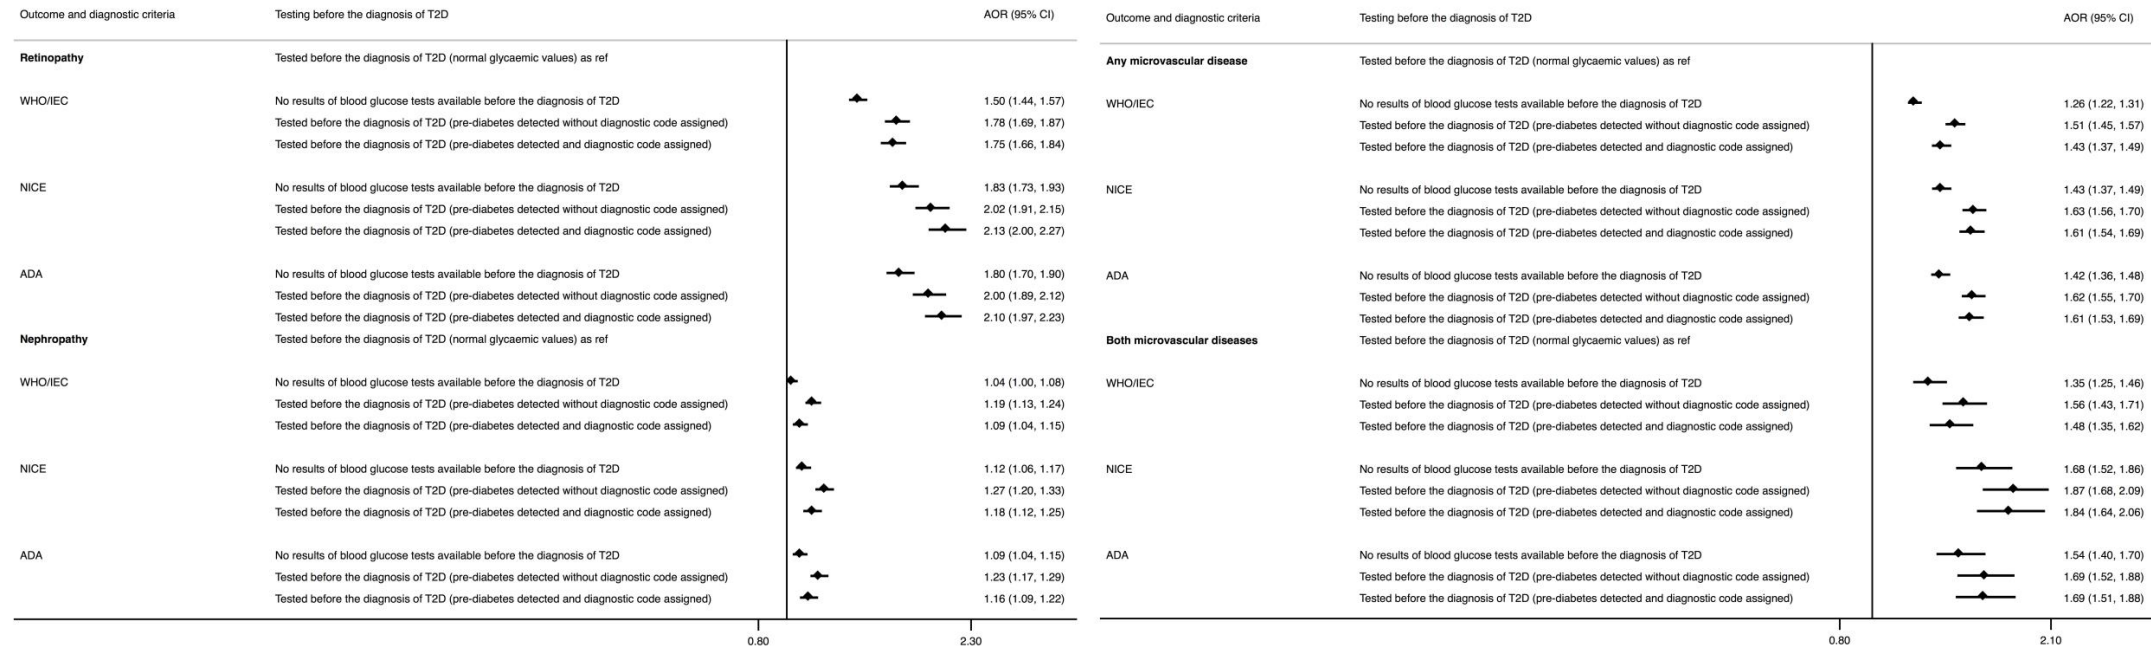



**Supplementary Figure S11. Association between testing and detection of pre-diabetes and presence of macrovascular disease at the time of diagnosis of Type 2 diabetes. For individuals with pre-diabetes detected a further stratification has been considered according to whether a corresponding diagnostic code was assigned at time of pre-diabetes detection.**

**Notes:** Adjusted Odds Ratios (AOR) and 95% confidence intervals (95% CI) have been estimated employing multivariable logistic regression models adjusted for age, sex, ethnicity (White, South Asian, Black, Other, Unknown), smoking status (non-smoker, ex-smoker, smoker), total cholesterol, systolic and diastolic blood pressure, number of co-existing chronic conditions, number of primary care visits in the previous year, general practice index of multideprivation, and year of diagnosis of Type 2 diabetes. Abbreviations: T2D: Type 2 diabetes.

WHO/IEC criteria to define pre-diabetes: FPG: 6.1-6.9 mmol/L, OGTT 7.8-11.1 mmol/L, HbA1c 42 to 47 mmol/mol or 6.0-6.4%

NICE criteria to define pre-diabetes: 5.5-6.9 mmol/L, OGTT 7.8-11.1 mmol/L, HbA1c 42 to 47 mmol/mol or 6.0-6.4%

ADA criteria to define pre-diabetes: FPG: 5.6-6.9 mmol/L, OGTT 7.8-11.1 mmol/L, HbA1c 39 to 47 mmol/mol or 5.7-6.4%

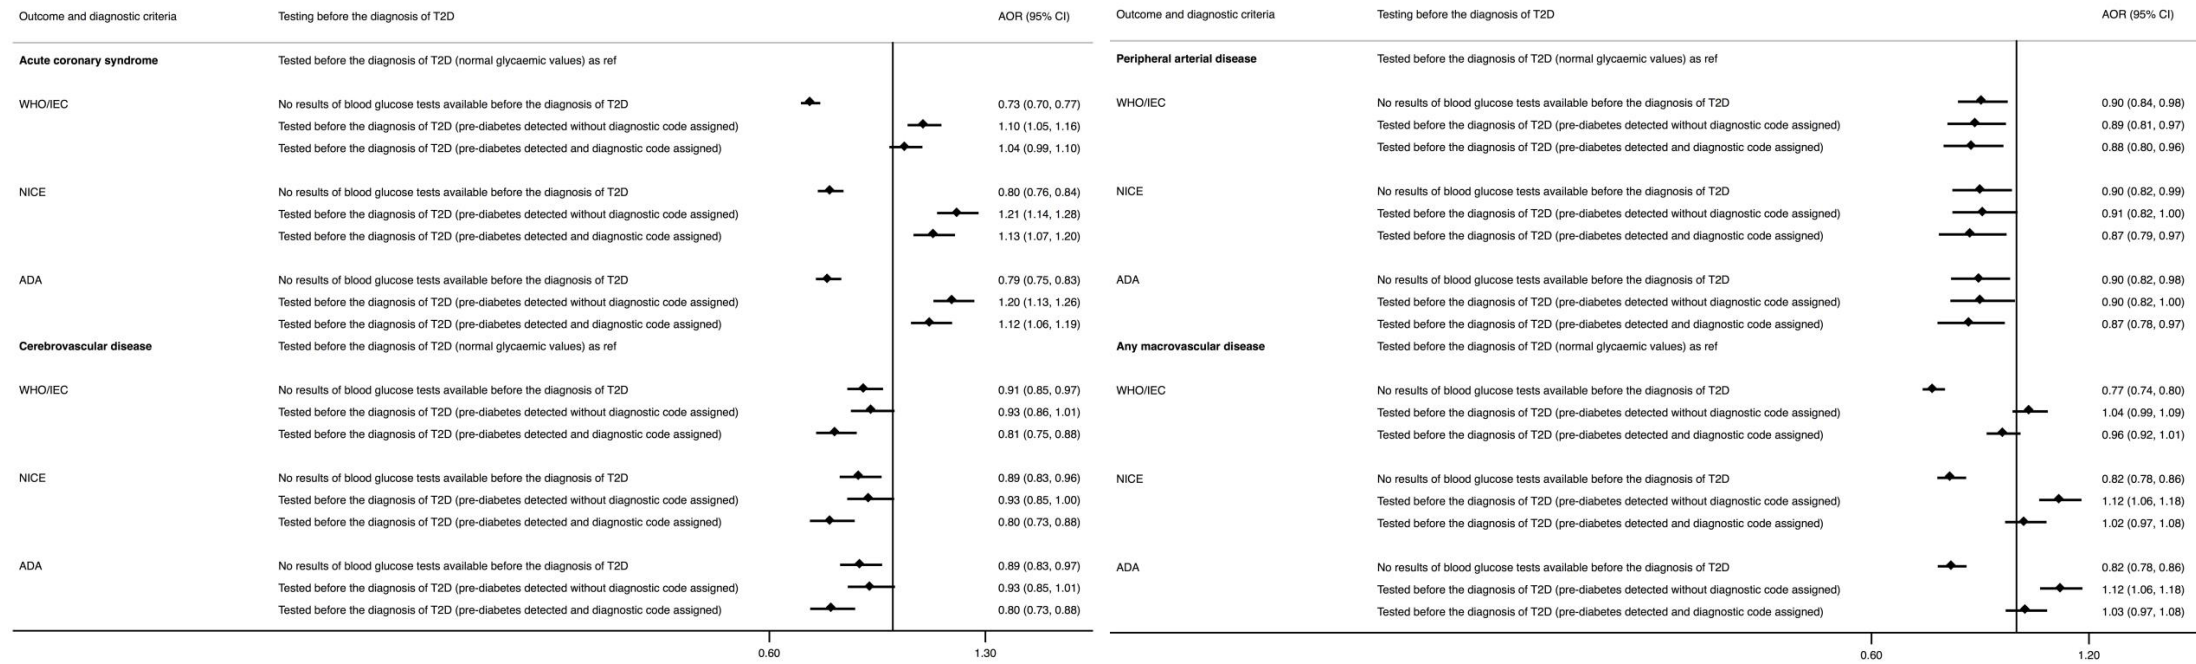

Supplement: bmjdrc-2019-001061supp001.pdf [file bmjdrc-2019-001061supp001.pdf]
